# Supplementary material
Source: PubMed Central journal article supplement (PMC4701217)
Supplement: NIHMS740719-supplement-materials.pdf [file NIHMS740719-supplement-materials.pdf]

(THIS PAGE IS FOR SURVEY RESEARCH TRACKING AND FILING PURPOSES ONLY)

# BIOPSY REQUISITION FORM

INVESTIGATOR: NNEKA COMFERE, MD

VERSION AS OF:  
MAY 1, 2012 WLD  
MAY 1, 2012 B WLD

CODING CHECK:

INCLUDE:



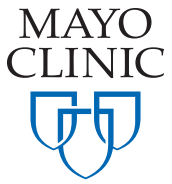

# Clinician-Pathologist Communication in Dermatology

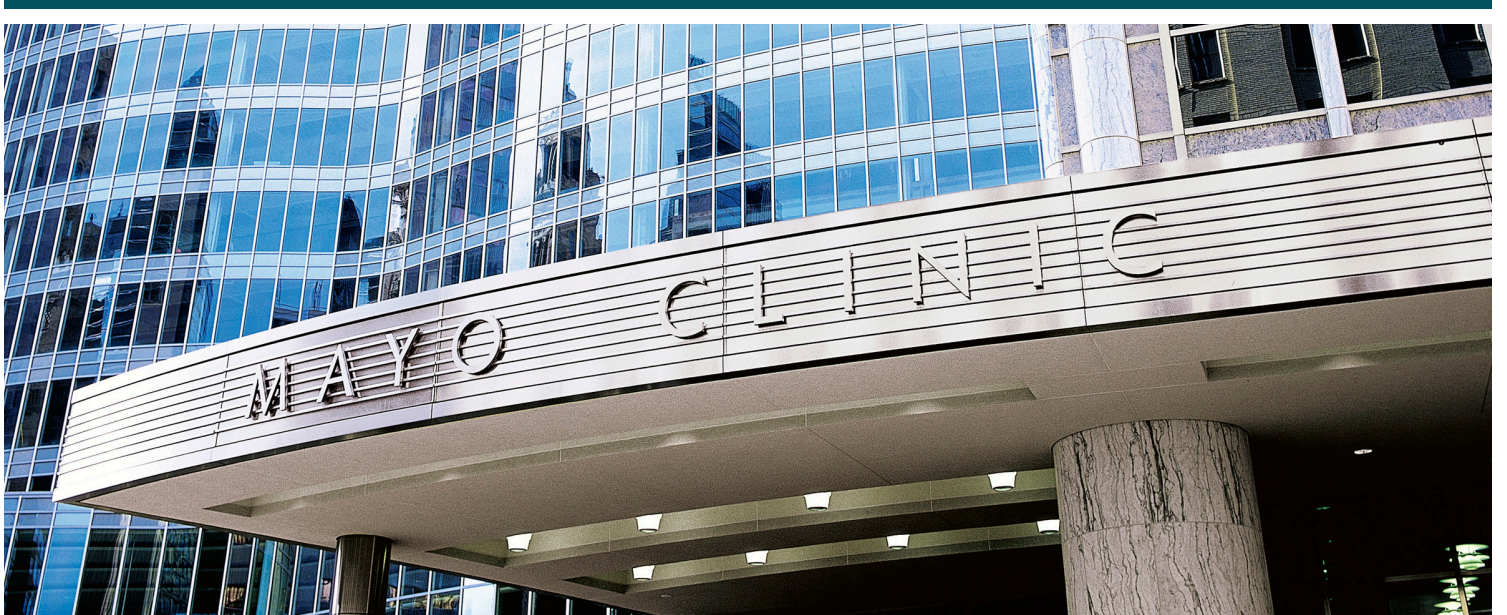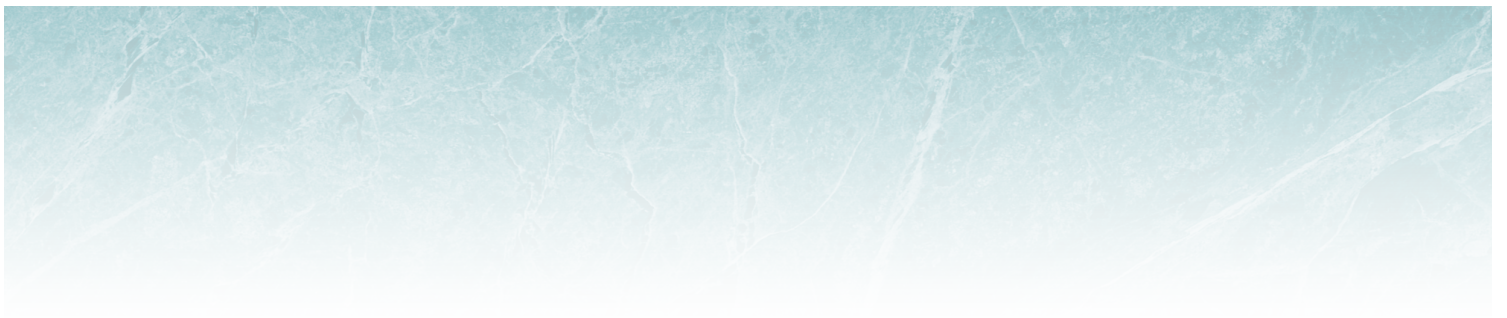

Survey Research Center



**INSTRUCTIONS: PLEASE CHECK THE APPROPRIATE BOX OR FILL IN THE BLANK AS INDICATED.**

**YOUR PRACTICE**

**1. For how many years have you interpreted dermatopathology specimens?**

- 1  Less than 5 years
- 2  5 to 10 years
- 3  More than 10 years
- 4  Not applicable

**2. Approximately how many dermatopathology cases do you accession per year?**

- 1  Less than 10,000 cases
- 2  10,000 to 29,999 cases
- 3  30,000 to 59,999 cases
- 4  Greater than 60,000 cases
- 4  Not applicable

**3. On average, how many cases do you read each day?**

- 1  Less than 50 cases
- 2  50 to 80 cases
- 3  More than 80 cases
- 4  Not applicable

**4. How much time do you spend in pathology practice?**

- 1  Full time (80 to 100% FTE)
- 2  Part time (less than 80% FTE)
- 3  Other, please specify: \_\_\_\_\_

**5. Which of the following statements best describes how you view your role as a dermatopathologist?**

- 1  It is my job to provide only a specific histopathologic diagnosis and description of the pertinent histopathologic findings.
- 2  It is my job to provide only a clinically meaningful histopathologic interpretation that incorporates guidance in clinical decision making.
- 3  Both of the above.
- 4  None of the above.

6. What is the predominant mode of communication utilized in your practice by requesting providers to convey clinical information related to skin biopsy specimens to the pathologist? (check one)

- 1  Verbal (face-face)
- 2  Verbal (telephone)
- 3  Written (manually completed requisition forms)
- 4  Written (electronic requisition forms)
- 5  Email
- 6  Fax
- 7  Other, please specify: \_\_\_\_\_

7. Indicate the extent of your satisfaction or dissatisfaction with the following modes of communication for conveying relevant clinical information related to skin biopsy specimens to the pathologist?

|                                             | Very<br>satisfied          | Somewhat<br>satisfied      | Somewhat<br>dissatisfied   | Very<br>dissatisfied       | Not<br>applicable          |
|---------------------------------------------|----------------------------|----------------------------|----------------------------|----------------------------|----------------------------|
| Verbal (face-face).....                     | 1 <input type="checkbox"/> | 2 <input type="checkbox"/> | 3 <input type="checkbox"/> | 4 <input type="checkbox"/> | 5 <input type="checkbox"/> |
| Verbal (telephone).....                     | 1 <input type="checkbox"/> | 2 <input type="checkbox"/> | 3 <input type="checkbox"/> | 4 <input type="checkbox"/> | 5 <input type="checkbox"/> |
| <b>Written</b>                              |                            |                            |                            |                            |                            |
| (manually completed requisition forms) ..   | 1 <input type="checkbox"/> | 2 <input type="checkbox"/> | 3 <input type="checkbox"/> | 4 <input type="checkbox"/> | 5 <input type="checkbox"/> |
| Written (electronic requisition forms) .... | 1 <input type="checkbox"/> | 2 <input type="checkbox"/> | 3 <input type="checkbox"/> | 4 <input type="checkbox"/> | 5 <input type="checkbox"/> |
| Email .....                                 | 1 <input type="checkbox"/> | 2 <input type="checkbox"/> | 3 <input type="checkbox"/> | 4 <input type="checkbox"/> | 5 <input type="checkbox"/> |
| Fax.....                                    | 1 <input type="checkbox"/> | 2 <input type="checkbox"/> | 3 <input type="checkbox"/> | 4 <input type="checkbox"/> | 5 <input type="checkbox"/> |
| Other, please specify:<br>_____             | 1 <input type="checkbox"/> | 2 <input type="checkbox"/> | 3 <input type="checkbox"/> | 4 <input type="checkbox"/> | 5 <input type="checkbox"/> |

Please consider the majority (middle 90%) of dermatopathology specimens that you interpret in your practice as you answer questions 8-12.

8. In the skin biopsy handoff tool that you receive, how often is relevant clinical information absent during histopathologic case review for each of the following broad categories of dermatopathologic diagnosis?

|                                                                                                         | Always                     | More than<br>half<br>the time | About<br>half<br>the time  | Less than<br>half<br>the time | Never                      |
|---------------------------------------------------------------------------------------------------------|----------------------------|-------------------------------|----------------------------|-------------------------------|----------------------------|
| Melanocytic proliferations<br>(benign and malignant) .....                                              | 1 <input type="checkbox"/> | 2 <input type="checkbox"/>    | 3 <input type="checkbox"/> | 4 <input type="checkbox"/>    | 5 <input type="checkbox"/> |
| Inflammatory dermatoses .....                                                                           | 1 <input type="checkbox"/> | 2 <input type="checkbox"/>    | 3 <input type="checkbox"/> | 4 <input type="checkbox"/>    | 5 <input type="checkbox"/> |
| Neoplastic proliferations<br>(epithelial, adnexal, lymphoproliferative<br>disorders and lymphoma) ..... | 1 <input type="checkbox"/> | 2 <input type="checkbox"/>    | 3 <input type="checkbox"/> | 4 <input type="checkbox"/>    | 5 <input type="checkbox"/> |
| Other, please specify:<br>_____                                                                         | 1 <input type="checkbox"/> | 2 <input type="checkbox"/>    | 3 <input type="checkbox"/> | 4 <input type="checkbox"/>    | 5 <input type="checkbox"/> |

9. How would you describe the quality of the clinical information provided by requesting providers, that accompany most of the skin biopsy specimens that you interpret?

- 1  Excellent
- 2  Very good
- 3  Good
- 4  Fair
- 5  Poor

10. How important is the dermatologic experience of the requesting provider on the quality of the of the clinical information that accompany most of the skin biopsy specimens that you interpret?

- 1  Very important
- 2  Somewhat important
- 3  Not important

11. How would you describe the completeness of the clinical information that accompany most of the skin biopsy specimens that you interpret?

- 1  Excellent
- 2  Very good
- 3  Good
- 4  Fair
- 5  Poor

12. How important is the dermatologic experience of the requesting provider on the completeness of the clinical information that accompany most of the skin biopsy specimens that you interpret?

- 1  Very important
- 2  Somewhat important
- 3  Not important

13. Please indicate the clinical items that are commonly **absent (greater than or equal to 50% of the time)** for each of the following types of conditions within the skin biopsy handoff tool supplied by requesting providers in your practice (check all that apply).

|    | Melanocytic<br>proliferations<br>(benign and<br>malignant) | Inflammatory<br>dermatoses | Neoplastic processes<br>(epithelial and adnexal,<br>lymphoproliferative<br>d/o, lymphoma) |
|----|------------------------------------------------------------|----------------------------|-------------------------------------------------------------------------------------------|
|    | ▼                                                          | ▼                          | ▼                                                                                         |
| 57 | <b>Patient name</b> . . . . .                              | 1 <input type="checkbox"/> | 1 <input type="checkbox"/>                                                                |
| 57 | <b>Patient age</b> . . . . .                               | 1 <input type="checkbox"/> | 1 <input type="checkbox"/>                                                                |
| 57 | <b>Patient gender</b> . . . . .                            | 1 <input type="checkbox"/> | 1 <input type="checkbox"/>                                                                |
| 57 | <b>Date of biopsy/excision</b> . . . . .                   | 1 <input type="checkbox"/> | 1 <input type="checkbox"/>                                                                |
| 57 | <b>Location of biopsy/excision</b> . . . . .               | 1 <input type="checkbox"/> | 1 <input type="checkbox"/>                                                                |
| 57 | <b>Morphology of lesion/dermatoses</b> . . . . .           | 1 <input type="checkbox"/> | 1 <input type="checkbox"/>                                                                |
| 57 | <b>ABCDE criteria</b> . . . . .                            | 1 <input type="checkbox"/> | 1 <input type="checkbox"/>                                                                |
| 57 | <b>Dermoscopic features</b> . . . . .                      | 1 <input type="checkbox"/> | 1 <input type="checkbox"/>                                                                |
| 57 | <b>Clinical photographs</b> . . . . .                      | 1 <input type="checkbox"/> | 1 <input type="checkbox"/>                                                                |
| 57 | <b>Results of relevant diagnostic tests</b> . . . . .      | 1 <input type="checkbox"/> | 1 <input type="checkbox"/>                                                                |
| 57 | <b>Previous diagnoses</b> . . . . .                        | 1 <input type="checkbox"/> | 1 <input type="checkbox"/>                                                                |
| 57 | <b>Previous treatments</b> . . . . .                       | 1 <input type="checkbox"/> | 1 <input type="checkbox"/>                                                                |
| 57 | <b>Current treatments</b> . . . . .                        | 1 <input type="checkbox"/> | 1 <input type="checkbox"/>                                                                |
| 57 | <b>Duration of lesion/dermatoses</b> . . . . .             | 1 <input type="checkbox"/> | 1 <input type="checkbox"/>                                                                |
| 57 | <b>Partial vs complete sampling</b> . . . . .              | 1 <input type="checkbox"/> | 1 <input type="checkbox"/>                                                                |
| 57 | <b>Specific clinical impression/diagnosis</b> . . . . .    | 1 <input type="checkbox"/> | 1 <input type="checkbox"/>                                                                |
| 57 | <b>Clinical differential diagnosis</b> . . . . .           | 1 <input type="checkbox"/> | 1 <input type="checkbox"/>                                                                |
| 57 | <b>Clinical symptoms</b> . . . . .                         | 1 <input type="checkbox"/> | 1 <input type="checkbox"/>                                                                |
| 57 | <b>Relevant clinical history</b> . . . . .                 | 1 <input type="checkbox"/> | 1 <input type="checkbox"/>                                                                |
| 57 | <b>Previous dermatopathologic diagnoses</b> . . . . .      | 1 <input type="checkbox"/> | 1 <input type="checkbox"/>                                                                |



14. Please indicate how relevant each of the following clinical components provided within the skin biopsy handoff tool supplied by requesting providers in your practice are for an accurate histopathologic interpretation within each broad category of dermatopathologic diagnosis (check all that apply).

|    | Melanocytic<br>proliferations<br>(benign and<br>malignant)<br>▼ | Inflammatory<br>dermatoses<br>▼ | Neoplastic processes<br>(epithelial and adnexal,<br>lymphoproliferative<br>d/o, lymphoma)<br>▼ |
|----|-----------------------------------------------------------------|---------------------------------|------------------------------------------------------------------------------------------------|
| 57 | <b>Patient name</b> . . . . .                                   | 1 <input type="checkbox"/>      | 1 <input type="checkbox"/>                                                                     |
| 57 | <b>Patient age</b> . . . . .                                    | 1 <input type="checkbox"/>      | 1 <input type="checkbox"/>                                                                     |
| 57 | <b>Patient gender</b> . . . . .                                 | 1 <input type="checkbox"/>      | 1 <input type="checkbox"/>                                                                     |
| 57 | <b>Date of biopsy/excision</b> . . . . .                        | 1 <input type="checkbox"/>      | 1 <input type="checkbox"/>                                                                     |
| 57 | <b>Location of biopsy/excision</b> . . . . .                    | 1 <input type="checkbox"/>      | 1 <input type="checkbox"/>                                                                     |
| 57 | <b>Morphology of lesion/dermatoses</b> . . . . .                | 1 <input type="checkbox"/>      | 1 <input type="checkbox"/>                                                                     |
| 57 | <b>ABCDE criteria</b> . . . . .                                 | 1 <input type="checkbox"/>      | 1 <input type="checkbox"/>                                                                     |
| 57 | <b>Dermoscopic features</b> . . . . .                           | 1 <input type="checkbox"/>      | 1 <input type="checkbox"/>                                                                     |
| 57 | <b>Clinical photographs</b> . . . . .                           | 1 <input type="checkbox"/>      | 1 <input type="checkbox"/>                                                                     |
| 57 | <b>Results of relevant diagnostic tests</b> . . . . .           | 1 <input type="checkbox"/>      | 1 <input type="checkbox"/>                                                                     |
| 57 | <b>Previous diagnoses</b> . . . . .                             | 1 <input type="checkbox"/>      | 1 <input type="checkbox"/>                                                                     |
| 57 | <b>Previous treatments</b> . . . . .                            | 1 <input type="checkbox"/>      | 1 <input type="checkbox"/>                                                                     |
| 57 | <b>Current treatments</b> . . . . .                             | 1 <input type="checkbox"/>      | 1 <input type="checkbox"/>                                                                     |
| 57 | <b>Duration of lesion/dermatoses</b> . . . . .                  | 1 <input type="checkbox"/>      | 1 <input type="checkbox"/>                                                                     |
| 57 | <b>Partial vs complete sampling</b> . . . . .                   | 1 <input type="checkbox"/>      | 1 <input type="checkbox"/>                                                                     |
| 57 | <b>Specific clinical impression/diagnosis</b> . . . . .         | 1 <input type="checkbox"/>      | 1 <input type="checkbox"/>                                                                     |
| 57 | <b>Clinical differential diagnosis</b> . . . . .                | 1 <input type="checkbox"/>      | 1 <input type="checkbox"/>                                                                     |
| 57 | <b>Clinical symptoms</b> . . . . .                              | 1 <input type="checkbox"/>      | 1 <input type="checkbox"/>                                                                     |
| 57 | <b>Relevant clinical history</b> . . . . .                      | 1 <input type="checkbox"/>      | 1 <input type="checkbox"/>                                                                     |
| 57 | <b>Previous dermatopathologic diagnoses</b> . . . . .           | 1 <input type="checkbox"/>      | 1 <input type="checkbox"/>                                                                     |

**EFFICIENCY OF SKIN BIOPSY HANDOFF TOOL**

15. On an average day, how much time do you spend searching for clinical information (reviewing medical records, contacting the requesting clinicians by email, phone call, chat etc), to assist with your histopathologic reviews?

- 1  None
- 2  Less than 30 minutes
- 3  30 – 59 minutes
- 4  60 – 89 minutes
- 5  90 minutes or more

16. Please indicate the extent of your agreement or disagreement with the following statements.

|                                                                                                                                                                                                                                     | Strongly<br>agree          | Somewhat<br>agree          | Somewhat<br>disagree       | Strongly<br>disagree       |
|-------------------------------------------------------------------------------------------------------------------------------------------------------------------------------------------------------------------------------------|----------------------------|----------------------------|----------------------------|----------------------------|
| Incomplete clinical information within the skin biopsy handoff tool inhibits my ability to diagnose with confidence .....                                                                                                           | 1 <input type="checkbox"/> | 2 <input type="checkbox"/> | 3 <input type="checkbox"/> | 4 <input type="checkbox"/> |
| Incomplete clinical information within the skin biopsy handoff tool impairs my ability to provide an accurate histopathologic diagnosis .....                                                                                       | 1 <input type="checkbox"/> | 2 <input type="checkbox"/> | 3 <input type="checkbox"/> | 4 <input type="checkbox"/> |
| I am less able to provide a specific histopathologic diagnosis when relevant clinical information in the skin biopsy handoff tool is missing or incomplete ..                                                                       | 1 <input type="checkbox"/> | 2 <input type="checkbox"/> | 3 <input type="checkbox"/> | 4 <input type="checkbox"/> |
| On average, it takes less time to complete histopathologic interpretation of a case when relevant clinical information in the skin biopsy handoff tool is provided .                                                                | 1 <input type="checkbox"/> | 2 <input type="checkbox"/> | 3 <input type="checkbox"/> | 4 <input type="checkbox"/> |
| On average, it takes less time to complete histopathologic interpretation of a case when relevant clinical information in the skin biopsy handoff tool is easily accessible (legible handwriting, no use of abbreviations etc)..... | 1 <input type="checkbox"/> | 2 <input type="checkbox"/> | 3 <input type="checkbox"/> | 4 <input type="checkbox"/> |
| Additional communication with the requesting provider is not necessary when relevant clinical information in the skin biopsy handoff tool is provided.....                                                                          | 1 <input type="checkbox"/> | 2 <input type="checkbox"/> | 3 <input type="checkbox"/> | 4 <input type="checkbox"/> |
| I am more likely to request additional histopathologic studies (recuts, rebiopsy, histochemical stains, molecular studies etc) when relevant clinical information in the skin biopsy handoff tool is missing or incomplete ...      | 1 <input type="checkbox"/> | 2 <input type="checkbox"/> | 3 <input type="checkbox"/> | 4 <input type="checkbox"/> |

17. What impact does the quality of the clinical information provided within the skin biopsy handoff tool have on the following?

(Mark one response on each line.)

|                                                                                        | No<br>impact<br>▼          | Small<br>impact<br>▼       | Large<br>impact<br>▼       |
|----------------------------------------------------------------------------------------|----------------------------|----------------------------|----------------------------|
| Diagnostic confidence .....                                                            | 1 <input type="checkbox"/> | 2 <input type="checkbox"/> | 3 <input type="checkbox"/> |
| 57 Diagnostic accuracy.....                                                            | 1 <input type="checkbox"/> | 2 <input type="checkbox"/> | 3 <input type="checkbox"/> |
| 57 Specificity of diagnosis .....                                                      | 1 <input type="checkbox"/> | 2 <input type="checkbox"/> | 3 <input type="checkbox"/> |
| 57 Speed of diagnosis .....                                                            | 1 <input type="checkbox"/> | 2 <input type="checkbox"/> | 3 <input type="checkbox"/> |
| 57 Need for additional communication with the requesting<br>clinician .....            | 1 <input type="checkbox"/> | 2 <input type="checkbox"/> | 3 <input type="checkbox"/> |
| 57 Need for additional histopathologic studies<br>(stains, recuts, other studies)..... | 1 <input type="checkbox"/> | 2 <input type="checkbox"/> | 3 <input type="checkbox"/> |

18. What impact does the completeness of the clinical information provided within the skin biopsy handoff tool have on the following:

|                                                                                        | No<br>impact<br>▼          | Small<br>impact<br>▼       | Large<br>impact<br>▼       |
|----------------------------------------------------------------------------------------|----------------------------|----------------------------|----------------------------|
| Diagnostic confidence .....                                                            | 1 <input type="checkbox"/> | 2 <input type="checkbox"/> | 3 <input type="checkbox"/> |
| 57 Diagnostic accuracy.....                                                            | 1 <input type="checkbox"/> | 2 <input type="checkbox"/> | 3 <input type="checkbox"/> |
| 57 Specificity of diagnosis .....                                                      | 1 <input type="checkbox"/> | 2 <input type="checkbox"/> | 3 <input type="checkbox"/> |
| 57 Speed of diagnosis .....                                                            | 1 <input type="checkbox"/> | 2 <input type="checkbox"/> | 3 <input type="checkbox"/> |
| 57 Need for additional communication with the requesting<br>clinician .....            | 1 <input type="checkbox"/> | 2 <input type="checkbox"/> | 3 <input type="checkbox"/> |
| 57 Need for additional histopathologic studies<br>(stains, recuts, other studies)..... | 1 <input type="checkbox"/> | 2 <input type="checkbox"/> | 3 <input type="checkbox"/> |

CASE VIGNETTE 1

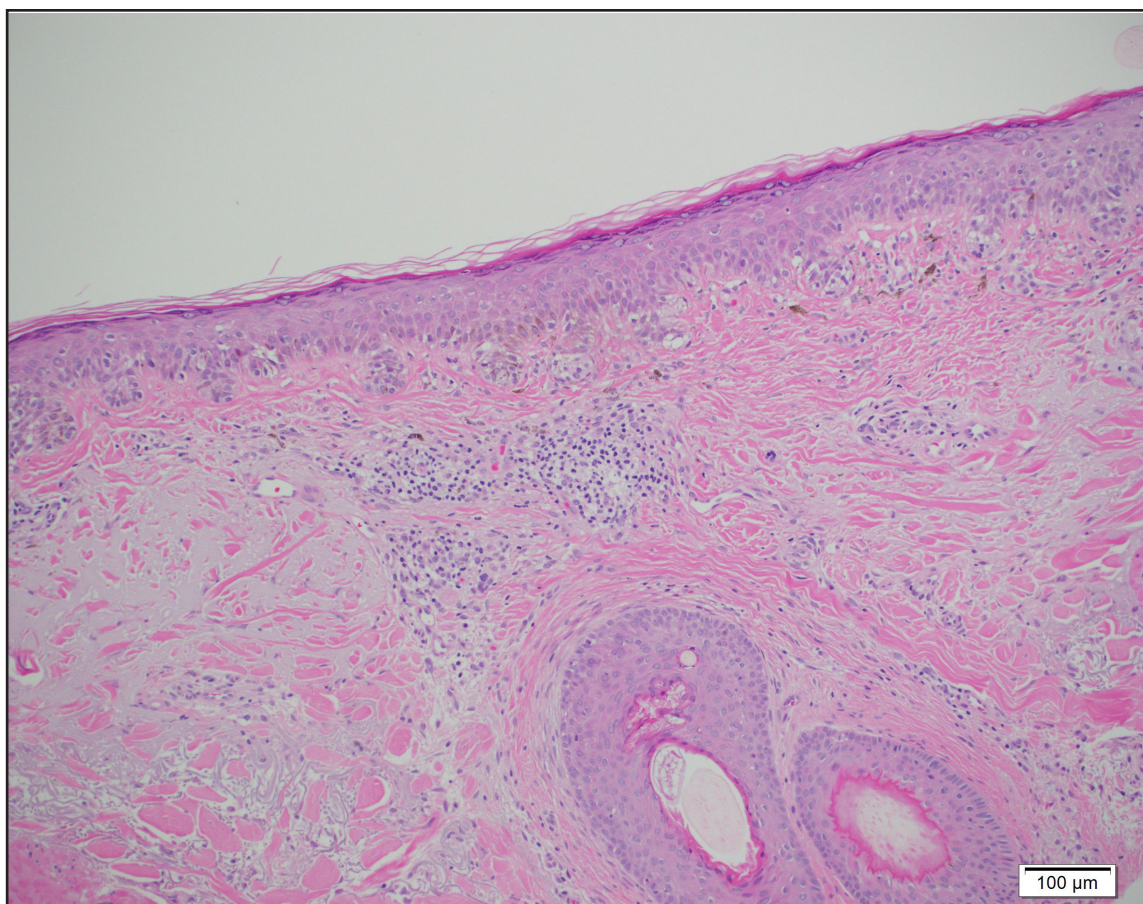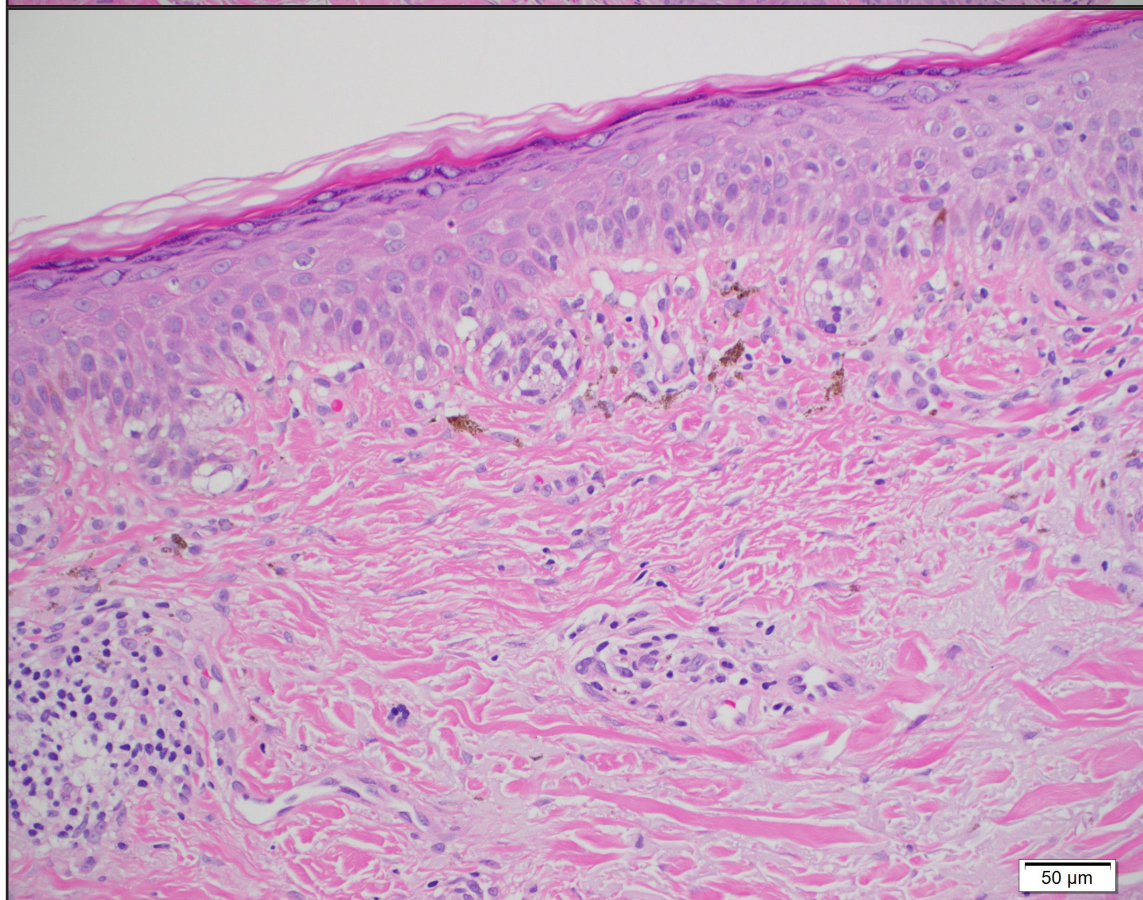

CASE VIGNETTE 1

19. The histopathologic images on page 8 demonstrate representative histopathology from a skin biopsy specimen. The skin biopsy handoff tool provides the following clinical information:

- Requesting provider name
- Patient name, 85 y/o, man
- Shave biopsy
- Location – right malar cheek
- Clinical impression – ‘lesion’

Please rate the quality of the representative histopathologic images for the purpose of establishing a diagnosis.

1  Poor    1  Moderate    2  Excellent

Based on your experience, indicate whether additional clinical information is necessary to render a meaningful histopathologic diagnosis with confidence?

1  No    1  Yes

If yes, please provide a list of clinical information that would be helpful to provide an accurate and meaningful histopathologic interpretation

---

---

---

Please indicate the need for additional histopathologic description or interpretation beyond the diagnostic impression.

1  Extremely necessary    1  Somewhat necessary    1  Somewhat unnecessary    1  Extremely unnecessary

Please indicate additional histopathologic description beyond the diagnostic impression that you feel would be necessary to supply within the pathology report

---

---

---

Please rate the quality of the representative histopathologic images for the purpose of establishing a diagnosis.

1  Very comfortable    1  Moderately comfortable    2  Not at all comfortable

CASE VIGNETTE 2

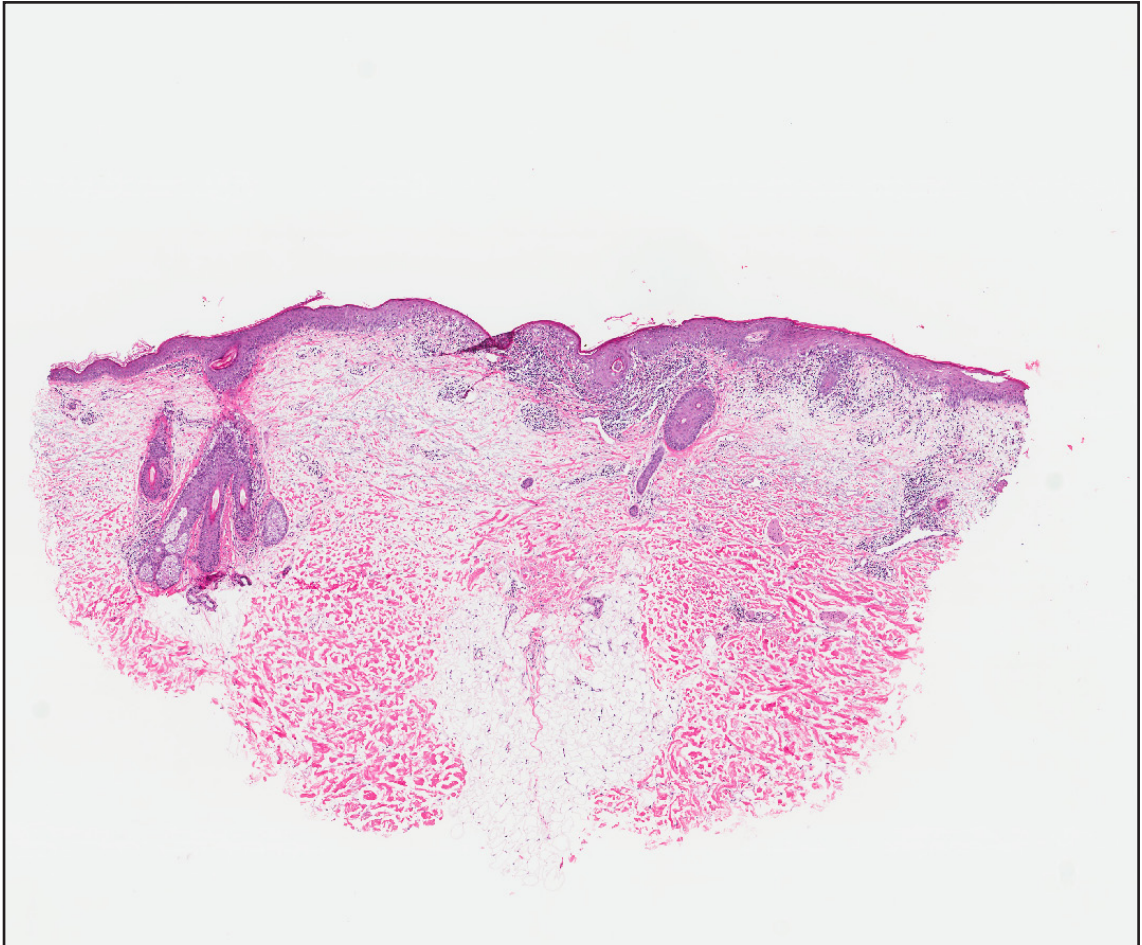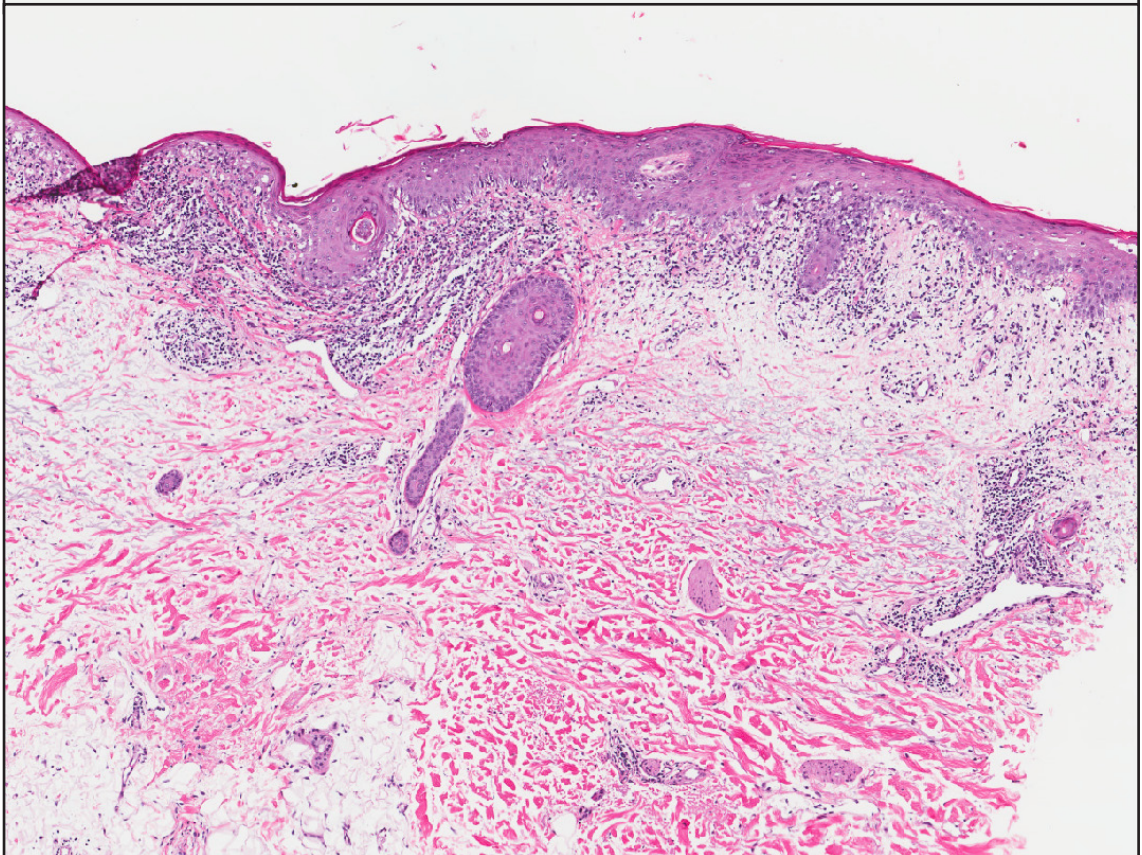

CASE VIGNETTE 2

20. The histopathologic image on page 10 demonstrate representative histopathology from a skins biopsy specimen. The skin biopsy handoff tool provides the following clinical information:

- Requesting provider name
- Patient name, 50 y/o, woman
- Shave biopsy
- Location – Right helix
- Clinical impression – r/o skin cancer

Please rate the quality of the representative histopathologic images for the purpose of establishing a diagnosis.

1  Poor    1  Moderate    2  Excellent

Based on your experience, indicate whether additional clinical information is necessary to render a meaningful histopathologic diagnosis with confidence?

1  No    1  Yes

If yes, please provide a list of clinical information that would be helpful to provide an accurate and meaningful histopathologic interpretation

---

---

---

Please indicate the need for additional histopathologic description or interpretation beyond the diagnostic impression.

1  Extremely necessary    1  Somewhat necessary    1  Somewhat unnecessary    1  Extremely unnecessary

Please indicate additional histopathologic description beyond the diagnostic impression that you feel would be necessary to supply within the pathology report

---

---

---

Please rate the quality of the representative histopathologic images for the purpose of establishing a diagnosis.

1  Very comfortable    1  Moderately comfortable    2  Not at all comfortable

**REACTION TO QUALITY OF CLINICAL INFORMATION IN YOUR CURRENT SKIN BIOPSY HANDOFF TOOL**

21. Please indicate the extent of your agreement or disagreement with the following statements.

|                                                                                                                                      | Strongly<br>disagree       | Moderately<br>disagree     | Moderately<br>agree        | Strongly<br>agree          |
|--------------------------------------------------------------------------------------------------------------------------------------|----------------------------|----------------------------|----------------------------|----------------------------|
| Vague clinical impressions or missing relevant clinical information in dermatopathology makes me uneasy. ....                        | 1 <input type="checkbox"/> | 2 <input type="checkbox"/> | 3 <input type="checkbox"/> | 4 <input type="checkbox"/> |
| I find the absence of relevant clinical information in the skin biopsy handoff tool in dermatopathology practice disconcerting. .... | 1 <input type="checkbox"/> | 2 <input type="checkbox"/> | 3 <input type="checkbox"/> | 4 <input type="checkbox"/> |
| Absence of relevant clinical information within the skin biopsy handoff tool often troubles me.....                                  | 1 <input type="checkbox"/> | 2 <input type="checkbox"/> | 3 <input type="checkbox"/> | 4 <input type="checkbox"/> |
| I usually feel anxious when I am not sure of a dermatopathologic interpretation. . . . .                                             | 1 <input type="checkbox"/> | 2 <input type="checkbox"/> | 3 <input type="checkbox"/> | 4 <input type="checkbox"/> |
| My enjoyment of the practice of dermatopathology is substantially lessened because of the threat of lawsuits.....                    | 1 <input type="checkbox"/> | 2 <input type="checkbox"/> | 3 <input type="checkbox"/> | 4 <input type="checkbox"/> |

**YOU AND YOUR PRACTICE**

22. Which best describes your primary practice organization?

- 1  Community dermatopathology practice (with or without academic affiliation)
- 2  University affiliated medical center dermatopathology practice
- 3  University affiliated medical center dermatopathology practice
- 4  Other, please specify: \_\_\_\_\_

23. Which of the following best describes the compensation structure of your dermatopathology practice?

- 1  Billing only
- 2  Salary only
- 3  Salary plus bonus
- 4  Other, please specify: \_\_\_\_\_

24. How many pathologists interpret skin specimens in your practice (including yourself)?

- 1  1
- 2  2 to 10
- 3  Greater than 10



25. What was the nature of your residency training prior to dermatopathology fellowship?

- 1  Dermatology residency
- 2  Pathology residency
- 3  Other, please specify: \_\_\_\_\_

26. What is the size of your predominant practice setting?

- 1  Less than or equal to 2 pathologists
- 2  More than 3 pathologists

27. What is the predominant composition of your referral provider base? (check all that apply)

- 1  Primary care physicians
- 2  General surgery and surgery subspecialties
- 3  Dermatologists
- 3  Pathologists
- 3  Non-physician providers (NPs, PAs)

28. What is the year of your birth? \_\_\_\_ Year

29. What is your gender?

- 1  Male
- 2  Female

**RE-IMAGINING THE IDEAL SKIN BIOPSY HANDOFF TOOL**

We are interested in developing and testing a skin biopsy handoff tool to facilitate the efficient provision of relevant clinical information to the pathologist at the point of care to support meaningful dermatopathologic interpretation .

30. Please describe your ideal skin biopsy handoff tool including the mode and format that supports effective and efficient communication between the requesting provider and the pathologist?

---

---

---

**Thank you for completing the survey !**
